# Supplementary material for: Base editing repairs an SGCA mutation in human primary muscle stem cells
Source: JCI journal article supplement (doi:10.1172/jci.insight.145994), 2021-04-13
Supplement: sd1 [file 1]

## **SUPPLEMENTAL DATA**

### **Base editing repairs an *SGCA* mutation in human primary muscle stem cells**

Helena Escobar<sup>1\*</sup>, Anne Krause<sup>1</sup>, Sandra Keiper<sup>2</sup>, Janine Kieshauer<sup>1</sup>, Stefanie Müthel<sup>1</sup>, Manuel García de Paredes<sup>1</sup>, Eric Metzler<sup>1</sup>, Ralf Kühn<sup>3</sup>, Florian Heyd<sup>2</sup>, Simone Spuler<sup>1\*</sup>.

<sup>1</sup> Muscle Research Unit, Experimental and Clinical Research Center, a joint cooperation of Charité Universitätsmedizin Berlin and Max-Delbrück Center for Molecular Medicine, Berlin, Germany

<sup>2</sup> Freie Universität Berlin, Institute of Chemistry and Biochemistry, Laboratory of RNA Biochemistry, Berlin, Germany

<sup>3</sup> Max-Delbrück Center for Molecular Medicine, Berlin, Germany

\*To whom correspondence should be addressed:

Helena Escobar, PhD, Charité Campus Buch, Lindenberger Weg 80, 13125 Berlin, [helena.escobar@charite.de](mailto:helena.escobar@charite.de); [helena.escobar@mdc-berlin.de](mailto:helena.escobar@mdc-berlin.de);

T+49 (0)30 450540523 (Gene editing strategies)

Simone Spuler, M.D., Charité Campus Buch, Lindenberger Weg 80, 13125 Berlin, [simone.spuler@charite.de](mailto:simone.spuler@charite.de); [simone.spuler@mdc-berlin.de](mailto:simone.spuler@mdc-berlin.de);

T+49 (0)30 450540501 (Translational design, muscle stem cells)

## SUPPLEMENTAL FIGURE LEGENDS

**Supplemental Figure 1. Genotyping of *SGCA* c.748-2A>G mutation in control 3.** *SGCA* sequence analysis of control 3 shows a heterozygous mutation in the splice acceptor of exon 7 (c.748-2A>G).

**Supplemental Figure 2. *SGCA* c.175G>A is an exonic splicing mutation.** (A) Sequence analysis of the exon 2-3 junction in the full-length (412 bp) RT-PCR band from the c.157G>A carrier from Fig. 2A shows no detectable inclusion of the mutant exon 2. (B) RT-PCR analysis of *SGCA* mRNA in human muscle tissue from controls and the heterozygous c.175G>A carrier. The primer binding sites on the *SGCA* coding sequence and the expected band sizes are displayed above. Control 3 is a heterozygous carrier of the *SGCA* c.748-2A>G mutation. Splicing of *SGCA* exons 4-9 is unaffected in the c.157G>A carrier. (C) RT-PCR analysis of *SGCA* mRNA in human muscle tissue from controls and the heterozygous c.175G>A carrier was performed using a <sup>32</sup>P-labeled forward primer and the products were separated by denaturing PAGE. Splice isoforms were quantified using Phosphoimager analysis. The primer binding sites and expected band sizes are displayed above. fl: splice isoform containing exons 1-5; Δ2: splice isoform missing exon 2; Δ2/3: splice isoform missing exons 2/3.

**Supplemental Figure 3. Minigene splicing assays in HEK293T cells.** (A) Scheme of minigene constructs as in Fig. 2E. (B) Splicing pattern of minigene constructs in HEK293T cells analyzed by low-cycle RT-PCR with a <sup>32</sup>P-labeled forward primer, products were separated by denaturing PAGE. Quantification is shown in Fig. 2G. (C) Splicing pattern of minigene constructs in HEK293T cells analyzed by RT-PCR and agarose gel electrophoresis. The splice isoforms identified were confirmed by Sanger sequencing and are shown on the right. *HPRT* was used as a housekeeping control for RT-PCR analysis. (D) Quantification of the splice isoforms from (C). Quantified values are presented as mean ± SD (n=3). \*: intron-retention isoforms. 2\*: truncated exon 2 (40 nt). 3\*: truncated exon 3 (-70 nt). E: exon. I: intron.

**Supplemental Figure 4. Generation and characterization of patient iPSC from patient primary myoblasts.** (A) Immunostaining of iPSC colonies with pluripotency markers. Scale bars: 50 μm. (B) Histopathological analysis of iPSC-derived teratomas containing tissues derived from the three germ layers. Scale bars: 50 μm. (C) Virtual karyotype analysis of patient iPSC. Regions of gain (duplications) are shown in green, regions of loss (deletions) are shown in red and regions of uniparental disomy (loss of heterozygosity) are shown in grey. Reportable are copy number changes (gains and losses) greater than 0.4Mb compared to the human reference genome and regions of loss of heterozygosity above 3 Mb. (D) Histogram plots of flow cytometric analysis of the pluripotency markers SSEA4, Tra1-60, Nanog, Oct3/4, and the differentiation marker SSEA1 in patient iPSC.

**Supplemental Figure 5. Gating strategies for FACS-sorting of Venus-positive iPSC and MuSC.** Representative FACS plots of primary patient MuSC (A) and iPSC (B) transfected with ABE7.10\_4.1/gRNA#1. Gates were defined to select for the viable cell population (P1) and for doublet exclusion (P2, P3). Venus-positive events (P4) were



separated according to their green fluorescence intensity using stringent gates to ensure a high purity sorting.

**Supplemental Figure 6. Adenine base editing in iPSC with a homozygous SGCA c.157G>A mutation.** (A) Experimental design. A plasmid encoding ABE7.10\_4.1 or ABE7.10\_3.1, a Venus reporter and a U6-driven gRNA expression cassette was transfected into patient iPSC where the c.157G>A mutation had been converted to homozygosity. Venus-positive cells were selected via FACS-sorting and the bulk sorted population was analyzed. (B) EditR analysis of nucleotide rates at each protospacer position in patient iPSC transfected with ABE7.10\_4.1 and \_3.1 in combination with gRNA#1. iPSC transfected with ABE7.10\_4.1 without gRNA are shown as control. (C) c.157G/A nucleotide rates in EditR analysis from (B). The quantified values are presented as mean  $\pm$  SD (n=2).

**Supplemental Figure 7. Heatmap of A>G conversion rates at the target locus in patient and carrier MuSC.** Crispresso2 analysis of amplicon sequencing data showing the percentage of A>G conversion at each position of the quantification window at the target sequence in Venus-positive patient (A) and carrier (B) MuSC. The target c.157A at protospacer position 6 is indicated in red and the bystander adenine at protospacer position 10 is indicated in orange. A range of concentrations for the ABE7.10\_4.1/gRNA#1 vector is shown. Venus-positive cells transfected with the ABE7.10\_4.1 vector without gRNA are shown as control.

**Supplemental Figure 8. Allele frequencies at the target locus in patient and carrier MuSC.** Crispresso2 analysis of allele frequencies in the quantification window at the target sequence in Venus-positive patient (A) and carrier (B) MuSC. Position c.157 of the SGCA CDS is indicated with a red arrow and the bystander adenine at protospacer position 10 is indicated with an orange arrow. The total number and percentage of reads for each allele type is shown on the right. A range of concentrations for the ABE7.10\_4.1/gRNA#1 vector is shown. Venus-positive cells transfected with the ABE7.10\_4.1 vector without gRNA are shown as control.

**Supplemental Figure 9. Heatmap of A>G conversion rates at the predicted off-target loci in patient MuSC.** Crispresso2 analysis of amplicon sequencing data showing the percentage of A>G conversion at each position of the quantification window at the four predicted exonic off-target sites (A to D) in Venus-positive patient MuSC. Adenines located in the ABE activity window are indicated in orange and mismatched nucleotides between the protospacer sequence and gRNA#1 are indicated with blue stars above. A range of concentrations for the ABE7.10\_4.1/gRNA#1 vector is shown. Venus-positive cells transfected with the ABE7.10\_4.1 vector without gRNA are shown as control.

**Supplemental Figure 10. Allele frequencies at the predicted off-target loci in patient MuSC.** Crispresso2 analysis of allele frequencies in the quantification window at the four predicted exonic off-target sites (A to D) in Venus-positive patient MuSC. Mismatched nucleotides between the protospacer sequence and gRNA#1 are indicated with blue stars above. The total number and percentage of reads for each allele type is shown on the right. A range of concentrations for the ABE7.10\_4.1/gRNA#1 vector is shown. Venus-positive cells transfected with the ABE7.10\_4.1 vector without gRNA are shown as control.

**Supplemental Figure 11. Donor-derived myofibers express  $\alpha$ -sarcoglycan.**

Grafted muscles were immunostained with antibodies against human Spectrin and  $\alpha$ -sarcoglycan. Scale bars: 50  $\mu$ m.

## **SUPPLEMENTAL FIGURES**

## Supplemental Figure 1

Control 3 (carrier *SGCA* c.742-2A>G)

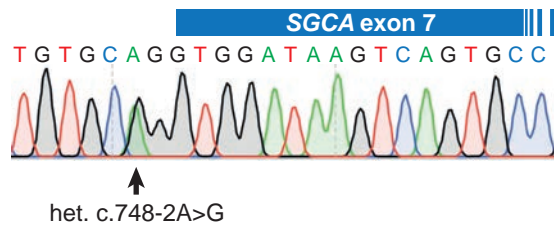

**Supplemental Figure 1. Genotyping of *SGCA* c.748-2A>G mutation in control 3.** *SGCA* sequence analysis of control 3 shows a heterozygous mutation in the splice acceptor of exon 7 (c.748-2A>G).

## Supplemental Figure 2

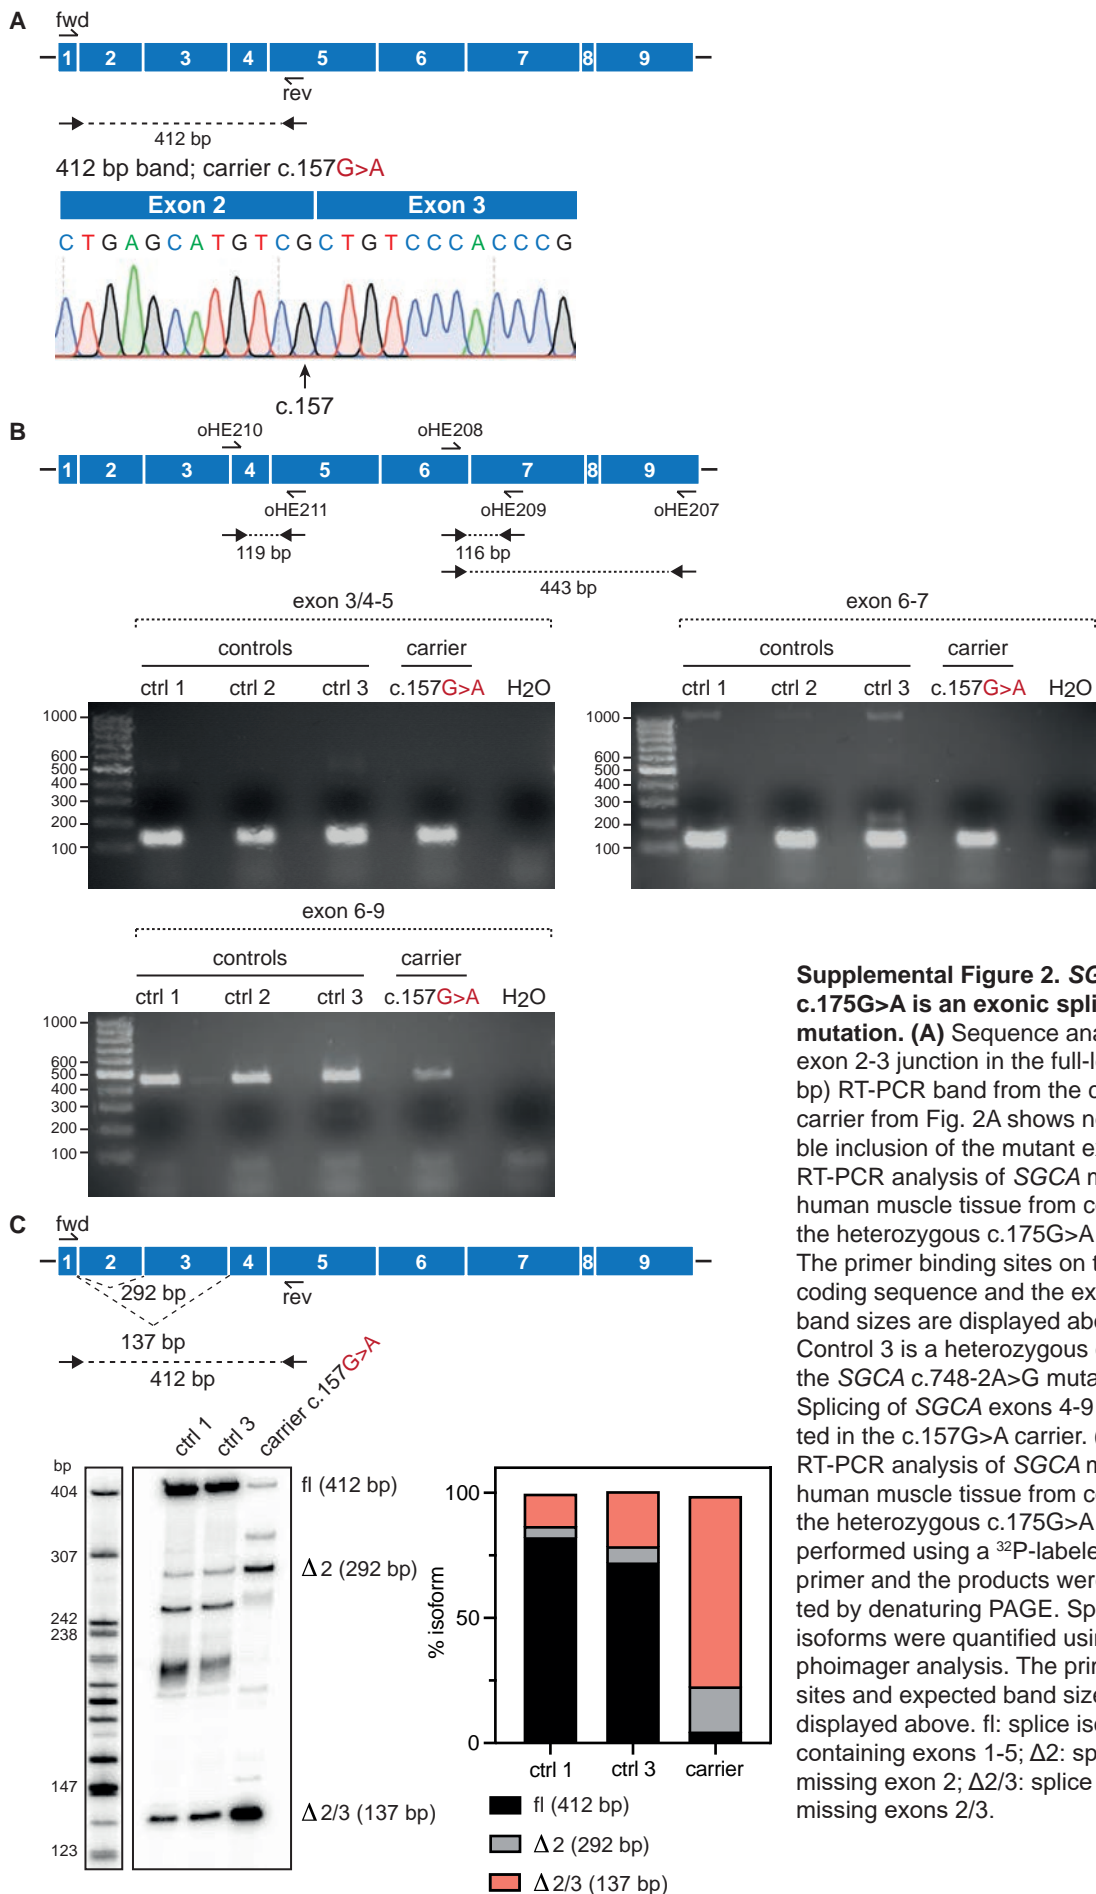

**Supplemental Figure 2. SGCA c.175G>A is an exonic splicing mutation.** (A) Sequence analysis of the exon 2-3 junction in the full-length (412 bp) RT-PCR band from the c.157G>A carrier from Fig. 2A shows no detectable inclusion of the mutant exon 2. (B) RT-PCR analysis of SGCA mRNA in human muscle tissue from controls and the heterozygous c.175G>A carrier. The primer binding sites on the SGCA coding sequence and the expected band sizes are displayed above. Control 3 is a heterozygous carrier of the SGCA c.748-2A>G mutation. Splicing of SGCA exons 4-9 is unaffected in the c.157G>A carrier. (C) RT-PCR analysis of SGCA mRNA in human muscle tissue from controls and the heterozygous c.175G>A carrier was performed using a <sup>32</sup>P-labeled forward primer and the products were separated by denaturing PAGE. Splice isoforms were quantified using Phosphorimager analysis. The primer binding sites and expected band sizes are displayed above. fl: splice isoform containing exons 1-5; Δ2: splice isoform missing exon 2; Δ2/3: splice isoform missing exons 2/3.

## Supplemental Figure 3

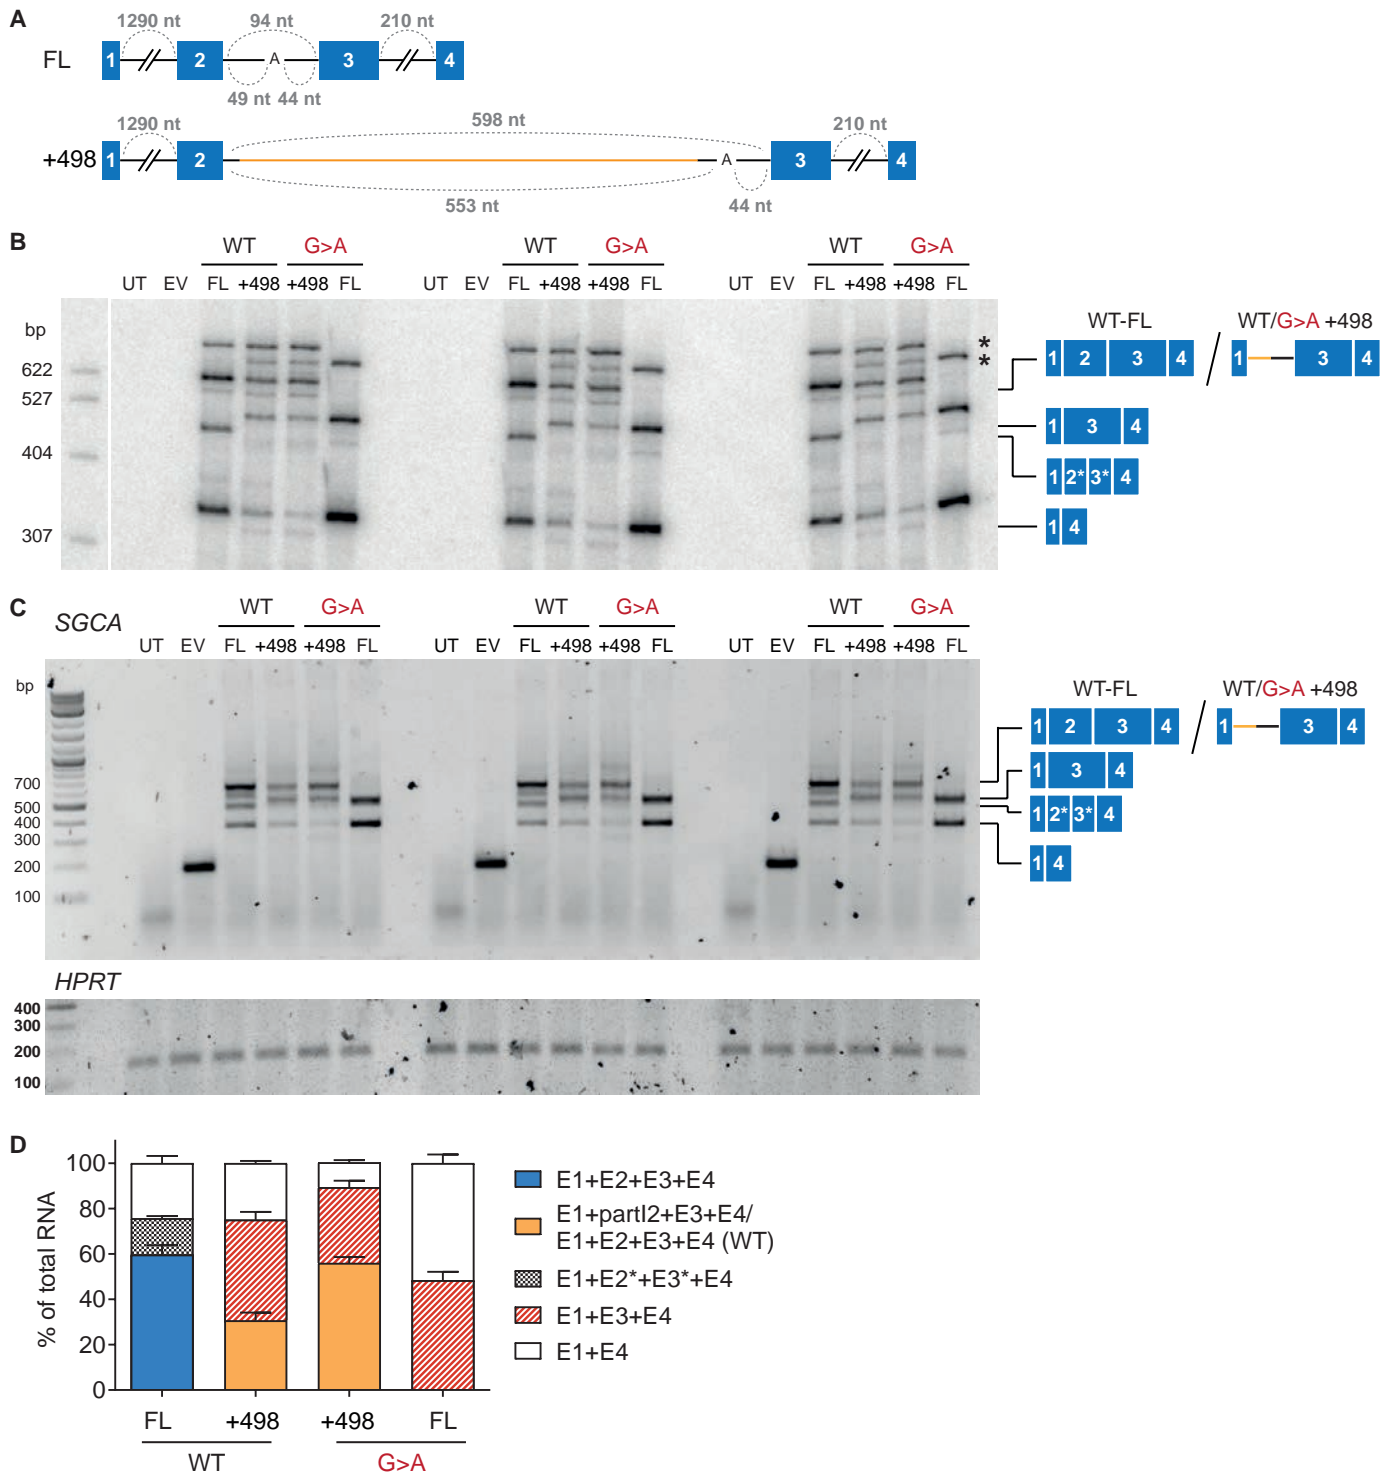

**Supplemental Figure 3. Minigene splicing assays in HEK293T cells. (A)** Scheme of minigene constructs as in Fig. 2E. **(B)** Splicing pattern of minigene constructs in HEK293T cells analyzed by low-cycle RT-PCR with a  $^{32}\text{P}$ -labeled forward primer, products were separated by denaturing PAGE. Quantification is shown in Fig. 2G. **(C)** Splicing pattern of minigene constructs in HEK293T cells analyzed by RT-PCR and agarose gel electrophoresis. The splice isoforms identified were confirmed by Sanger sequencing and are shown on the right. *HPRT* was used as a housekeeping control for RT-PCR analysis. **(D)** Quantification of the splice isoforms from (C). Quantified values are presented as mean  $\pm$  SD (n=3). \*: intron-retention isoforms. 2\*: truncated exon 2 (40 nt). 3\*: truncated exon 3 (-70 nt). E: exon. I: intron.

## Supplemental Figure 4

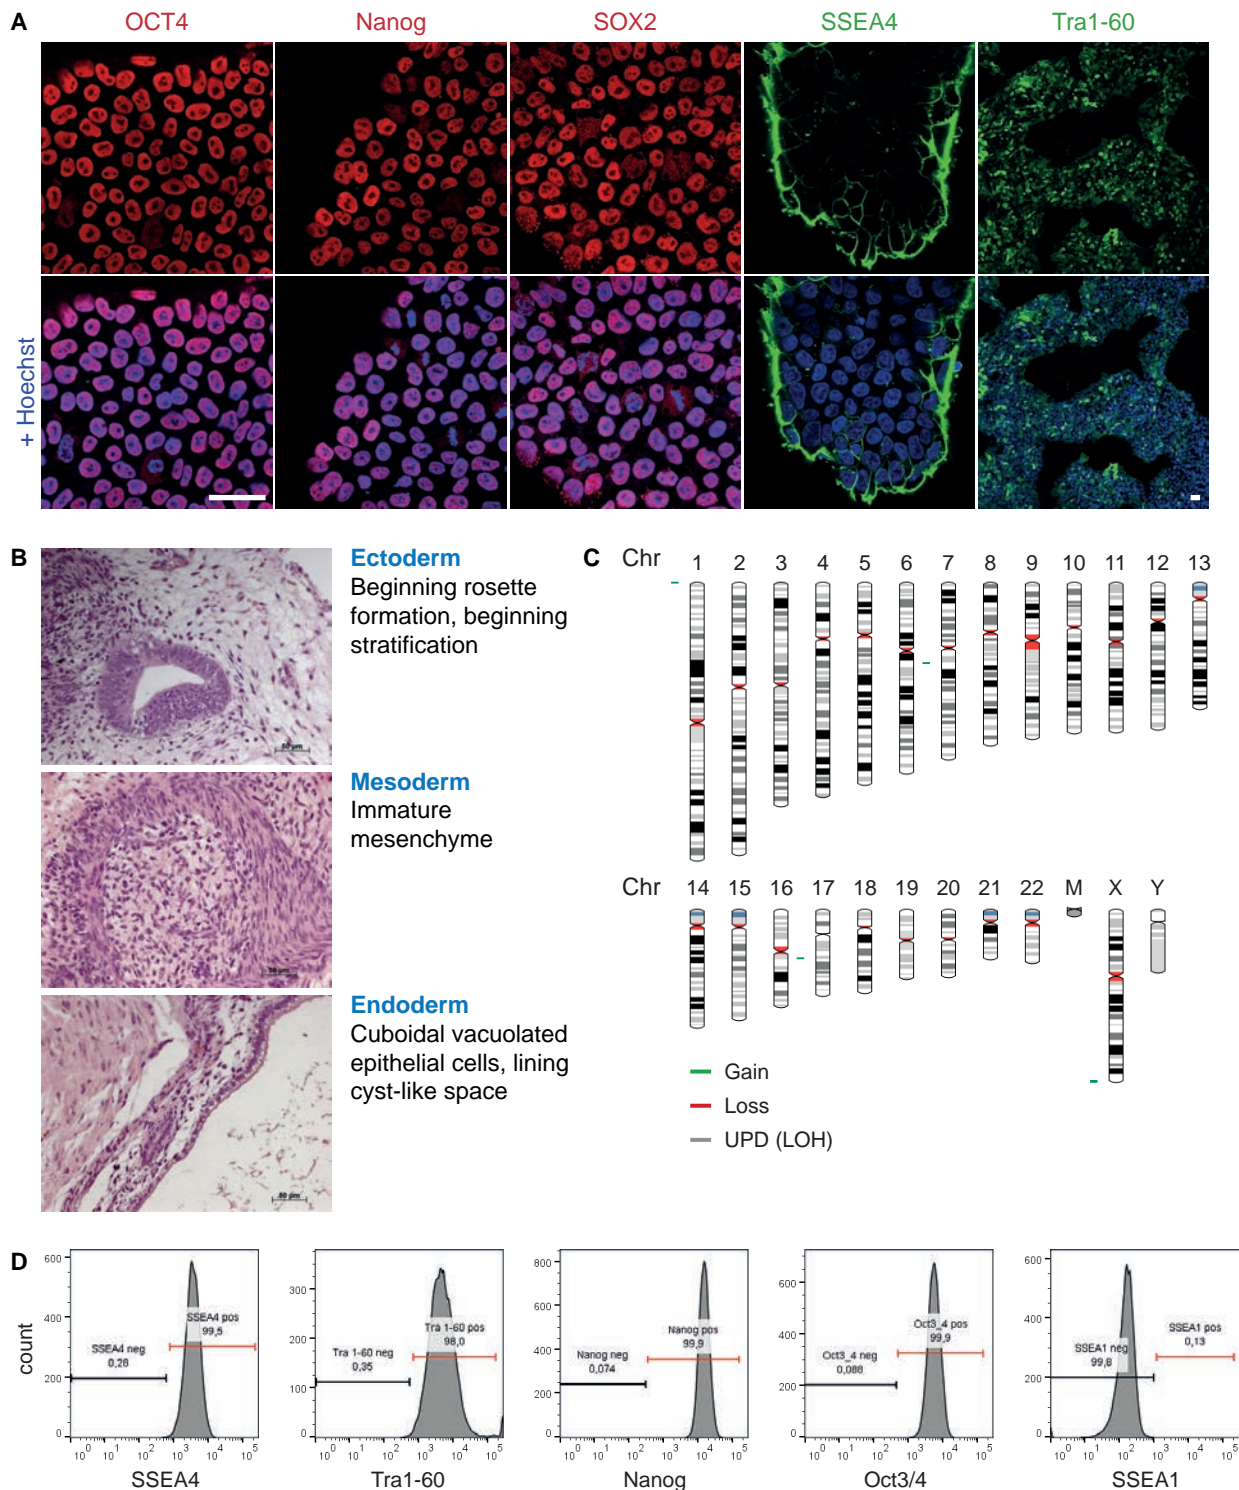

**Supplemental Figure 4. Generation and characterization of patient iPSC from patient primary myoblasts. (A)** Immunostaining of iPSC colonies with pluripotency markers. Scale bars: 50  $\mu$ m. **(B)** Histopathological analysis of iPSC-derived teratomas containing tissues derived from the three germ layers. Scale bars: 50  $\mu$ m. **(C)** Virtual karyotype analysis of patient iPSC. Regions of gain (duplications) are shown in green, regions of loss (deletions) are shown in red and regions of uniparental disomy (loss of heterozygosity) are shown in grey. Reportable are copy number changes (gains and losses) greater than 0.4Mb compared to the human reference genome and regions of loss of heterozygosity above 3 Mb. **(D)** Histogram plots of flow cytometric analysis of the pluripotency markers SSEA4, Tra1-60, Nanog, Oct3/4, and the differentiation marker SSEA1 in patient iPSC.



## Supplemental Figure 5

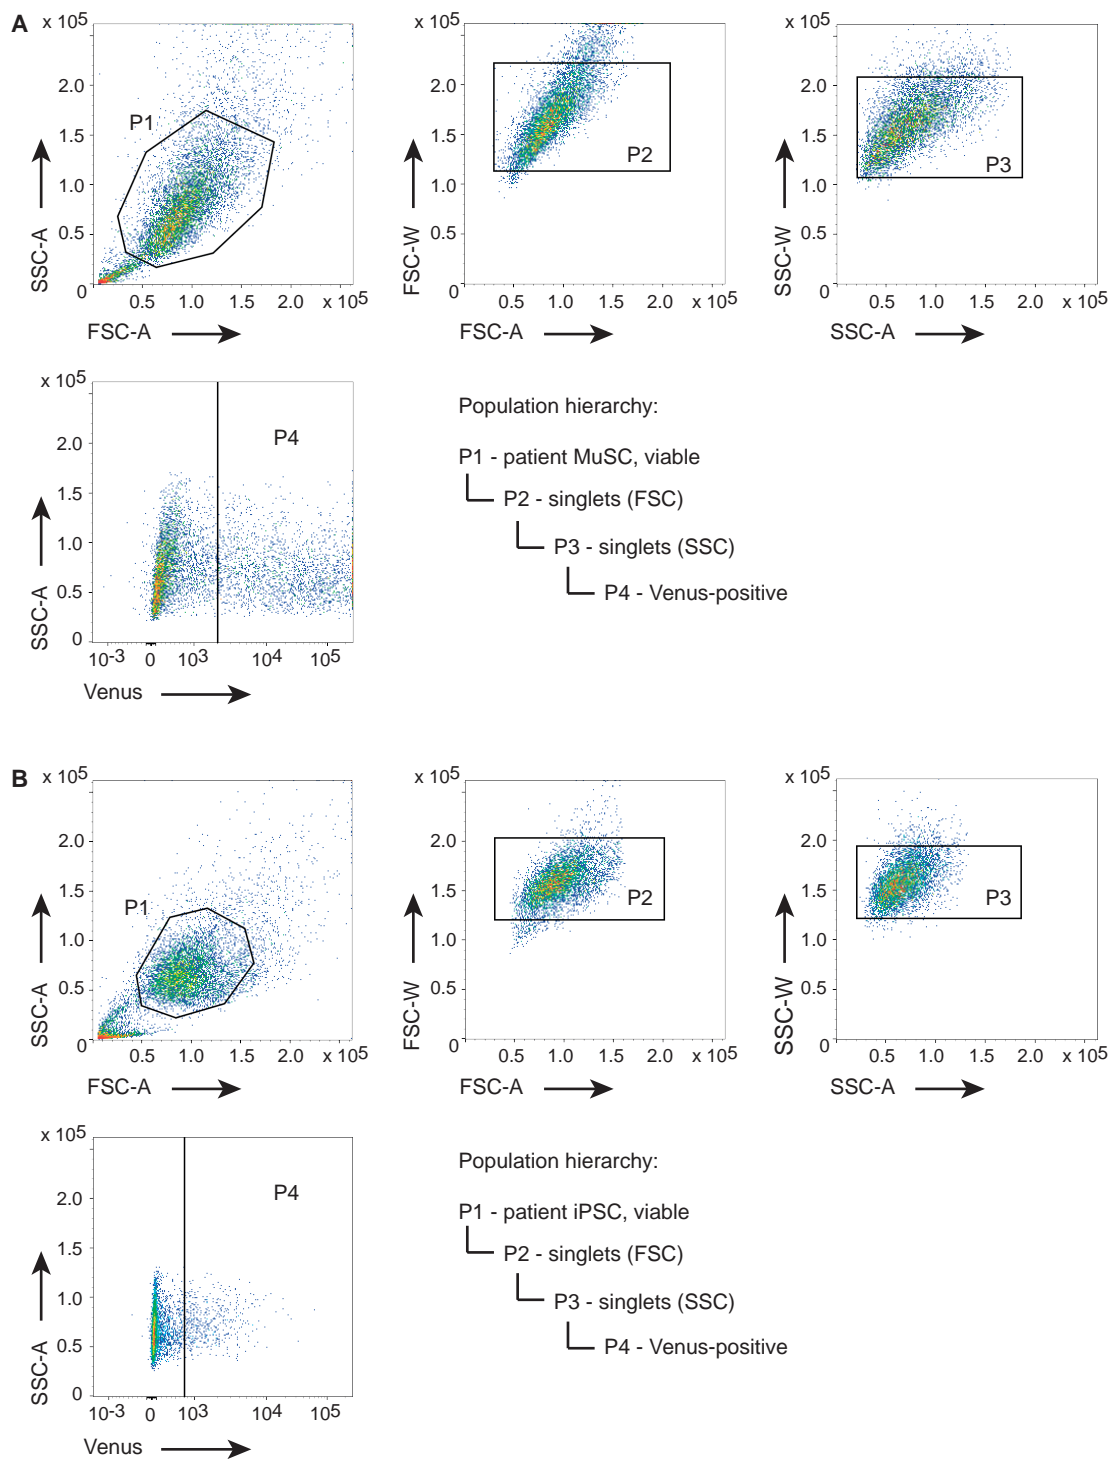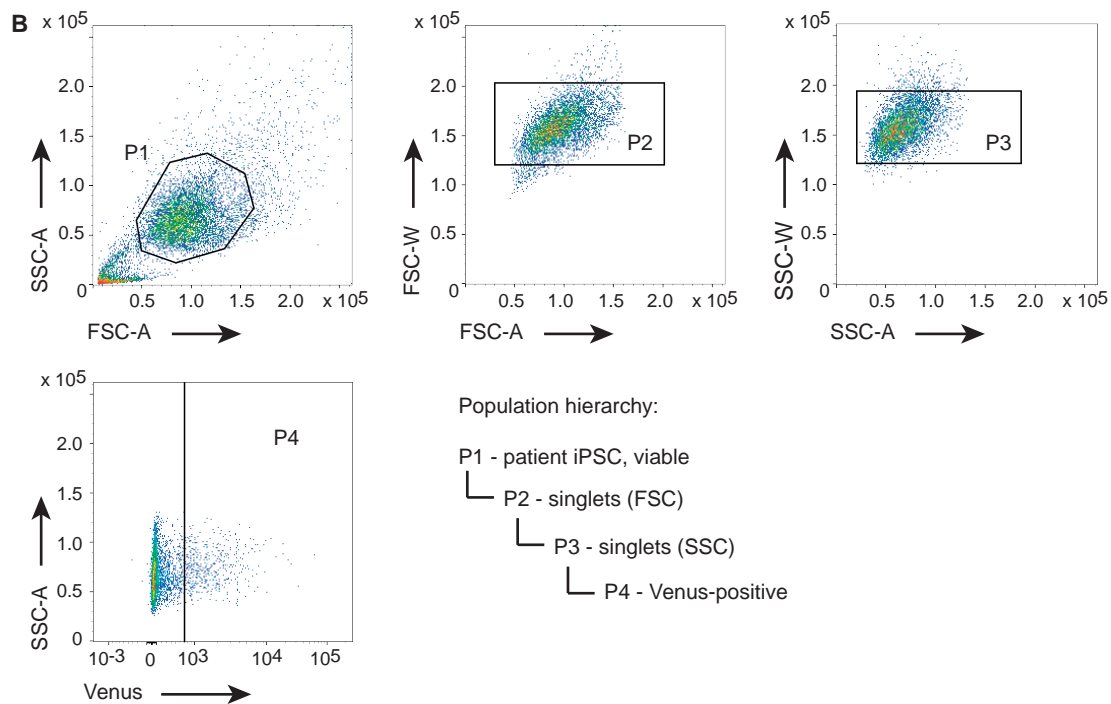

**Supplemental Figure 5. Gating strategies for FACS-sorting of Venus-positive iPSC and MuSC.** Representative FACS plots of primary patient MuSC (**A**) and iPSC (**B**) transfected with ABE7.10\_4.1/gRNA#1. Gates were defined to select for the viable cell population (P1) and for doublet exclusion (P2, P3). Venus-positive events (P4) were separated according to their green fluorescence intensity using stringent gates to ensure a high purity sorting.



## Supplemental Figure 6

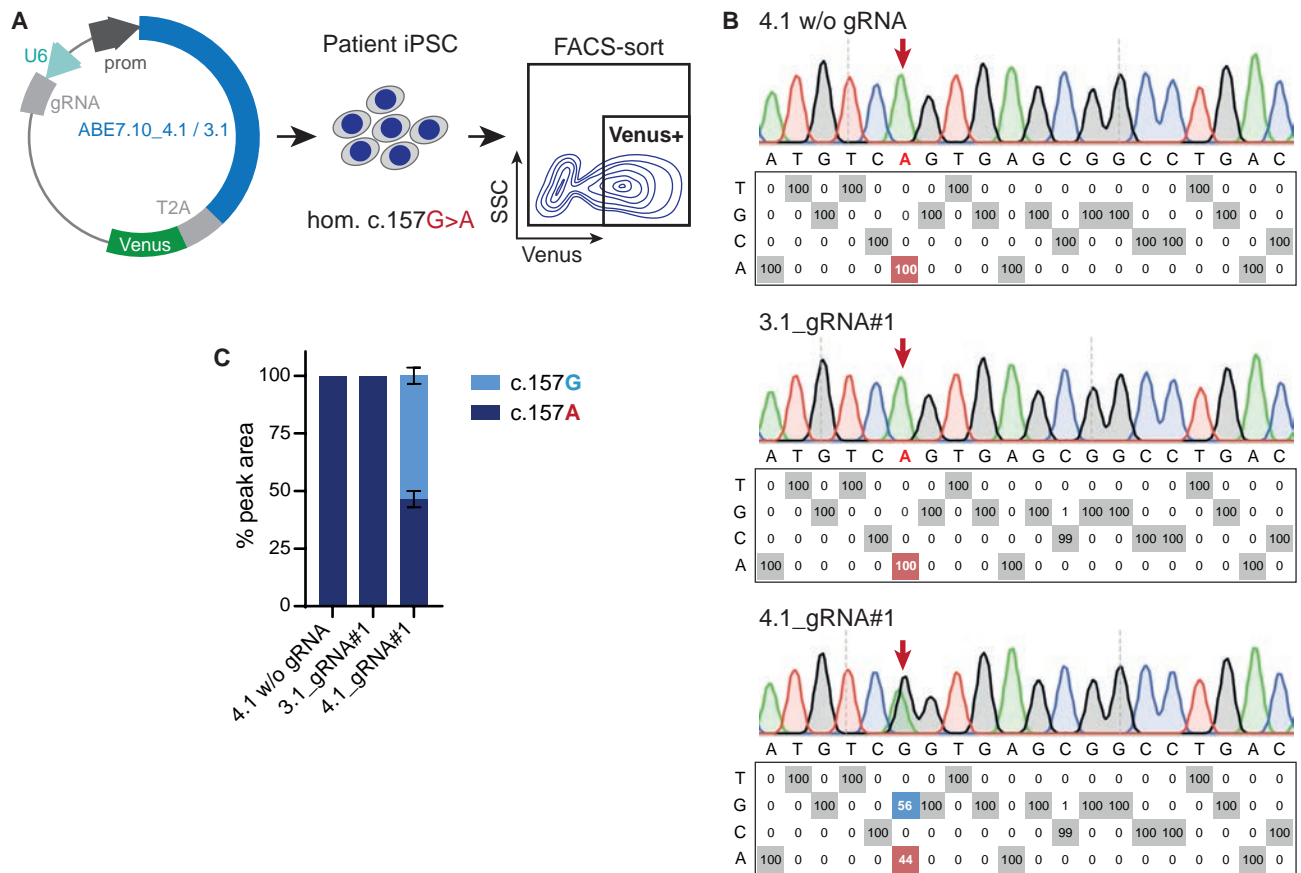

## Supplemental Figure 6. Adenine base editing in iPSC with a homozygous SGCA

**c.157G>A mutation. (A)** Experimental design. A plasmid encoding ABE7.10\_4.1 or ABE7.10\_3.1, a Venus reporter and a U6-driven gRNA expression cassette was transfected into patient iPSC where the c.157G>A mutation had been converted to homozygosity. Venus-positive cells were selected via FACS-sorting and the bulk sorted population was analyzed. **(B)** EditR analysis of nucleotide rates at each protospacer position in patient iPSC transfected with ABE7.10\_4.1 and \_3.1 in combination with gRNA#1. iPSC transfected with ABE7.10\_4.1 without gRNA are shown as control. **(C)** c.157G/A nucleotide rates in EditR analysis from (B). The quantified values are presented as mean  $\pm$  SD (n=2).

## Supplemental Figure 7

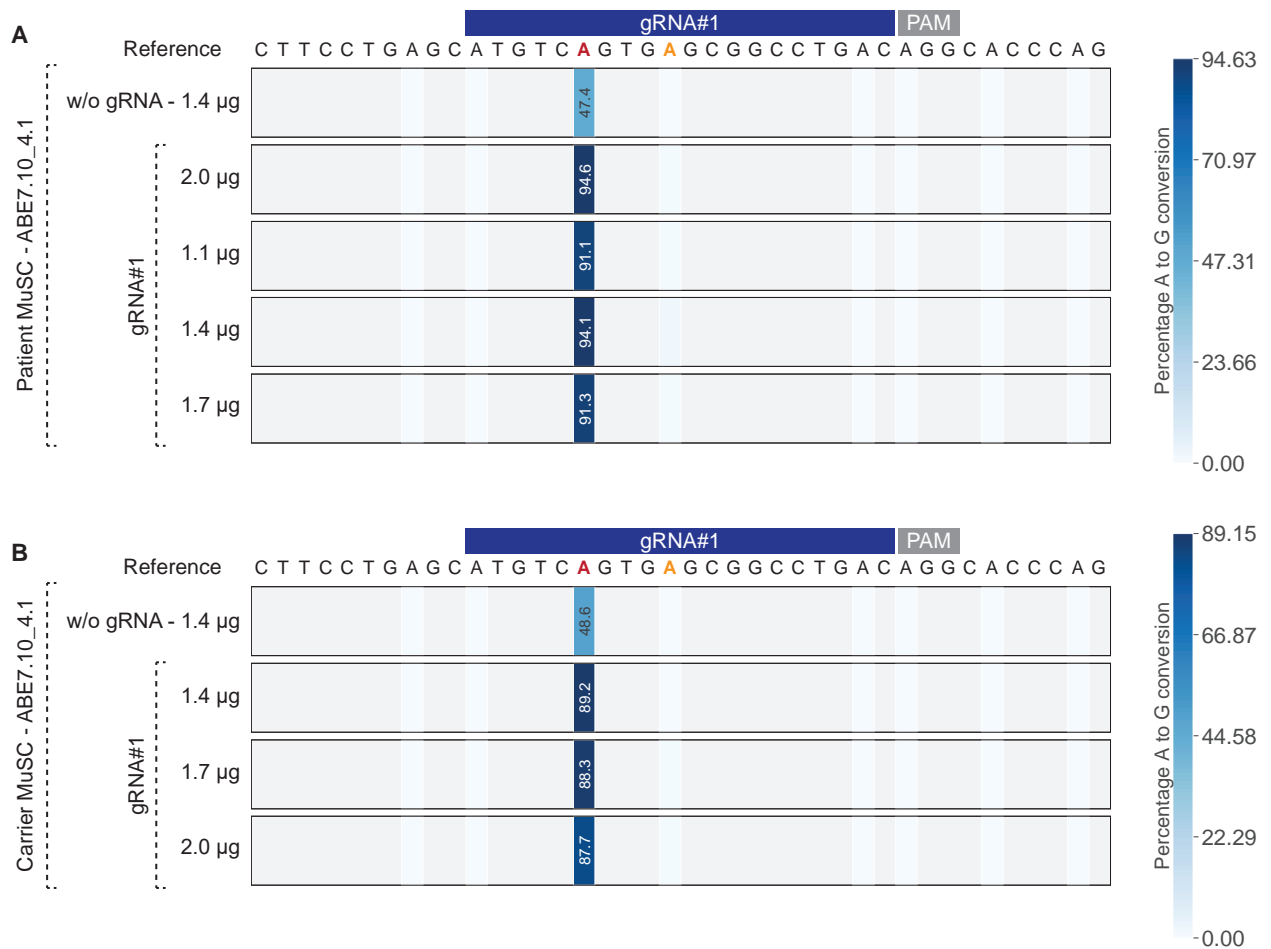

**Supplemental Figure 7. Heatmap of A>G conversion rates at the target locus in patient and carrier MuSC.** Crispresso2 analysis of amplicon sequencing data showing the percentage of A>G conversion at each position of the quantification window at the target sequence in Venus-positive patient (**A**) and carrier (**B**) MuSC. The target c.157A at protospacer position 6 is indicated in red and the bystander adenine at protospacer position 10 is indicated in orange. A range of concentrations for the ABE7.10\_4.1/gRNA#1 vector is shown. Venus-positive cells transfected with the ABE7.10\_4.1 vector without gRNA are shown as control.

## Supplemental Figure 8

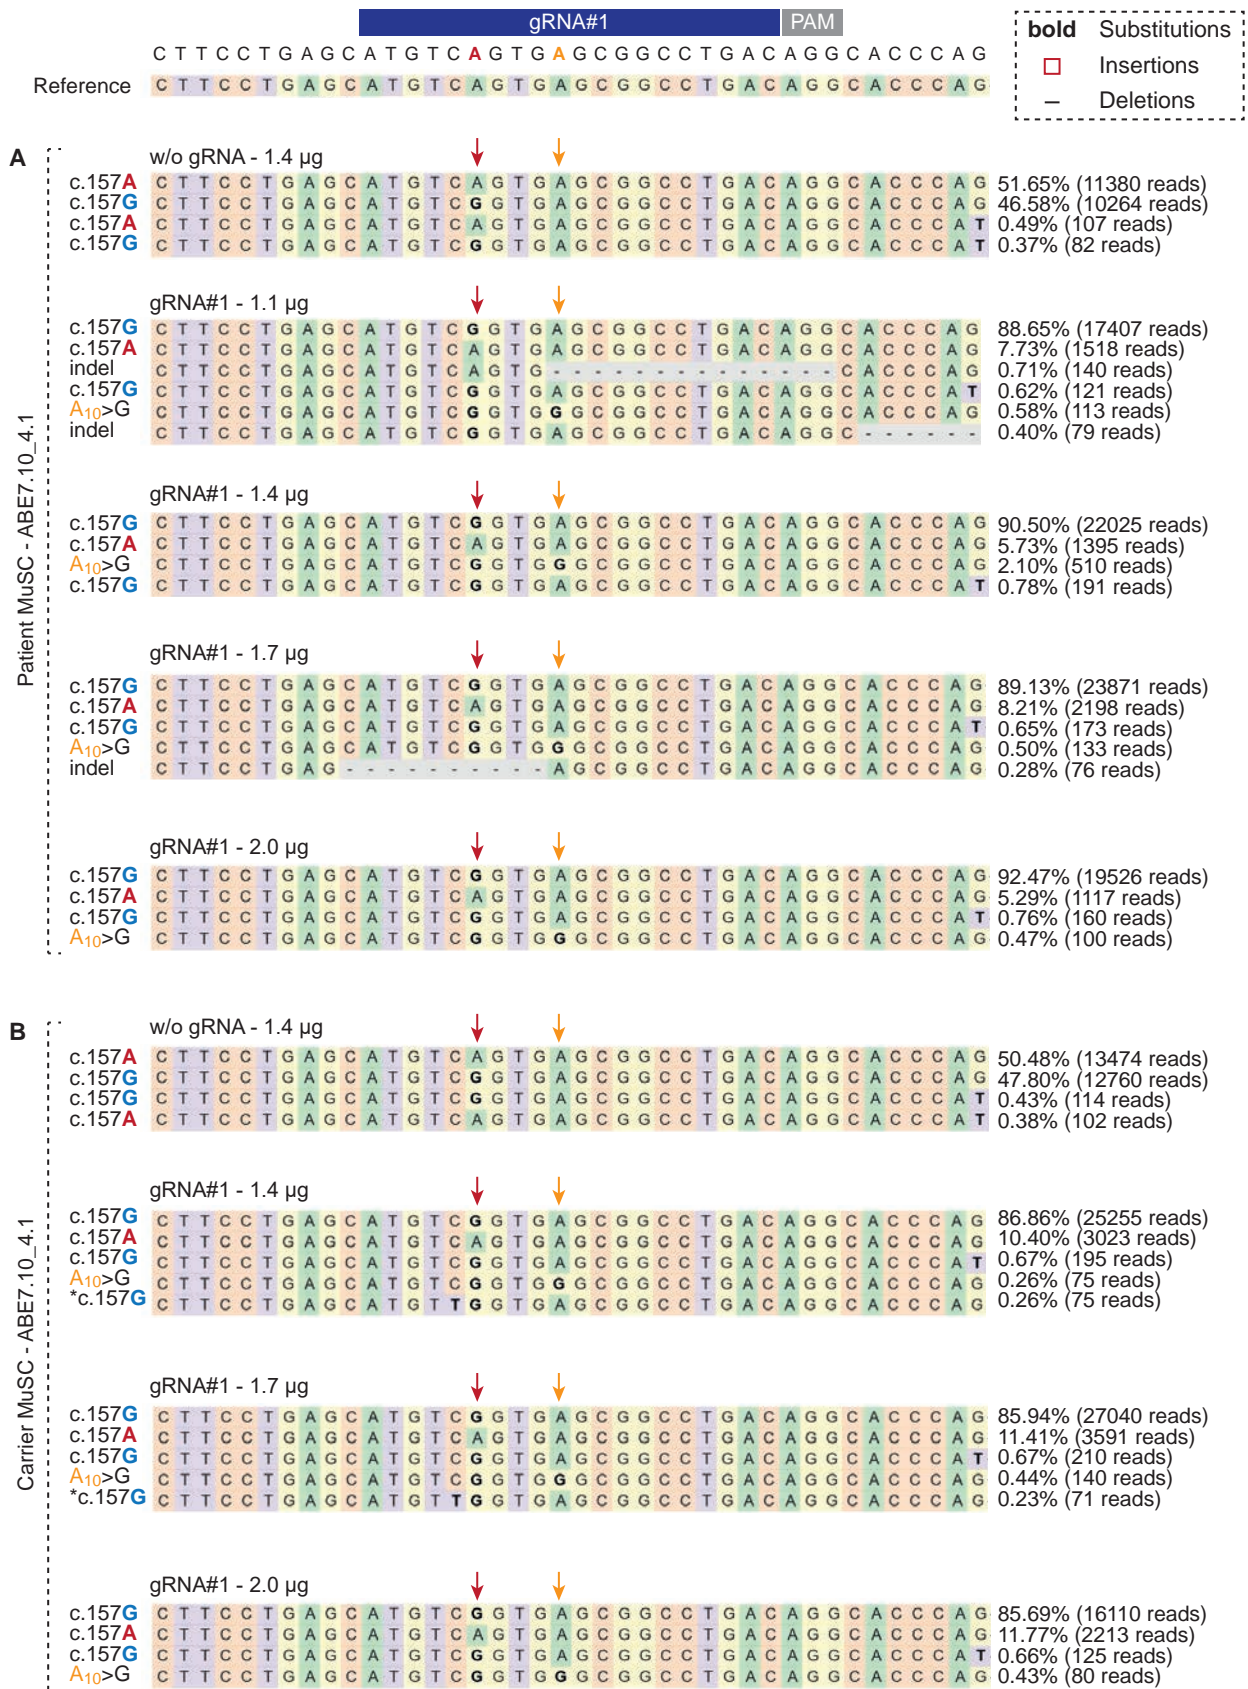

**Supplemental Figure 8. Allele frequencies at the target locus in patient and carrier MuSC.** Crispresso2 analysis of allele frequencies in the quantification window at the target sequence in Venus-positive patient (**A**) and carrier (**B**) MuSC. Position c.157 of the SGCA CDS is indicated with a red arrow and the bystander adenine at protospacer position 10 is indicated with an orange arrow. The total number and percentage of reads for each allele type is shown on the right. A range of concentrations for the ABE7.10\_4.1/gRNA#1 vector is shown. Venus-positive cells transfected with the ABE7.10\_4.1 vector without gRNA are shown as control.

## Supplemental Figure 9

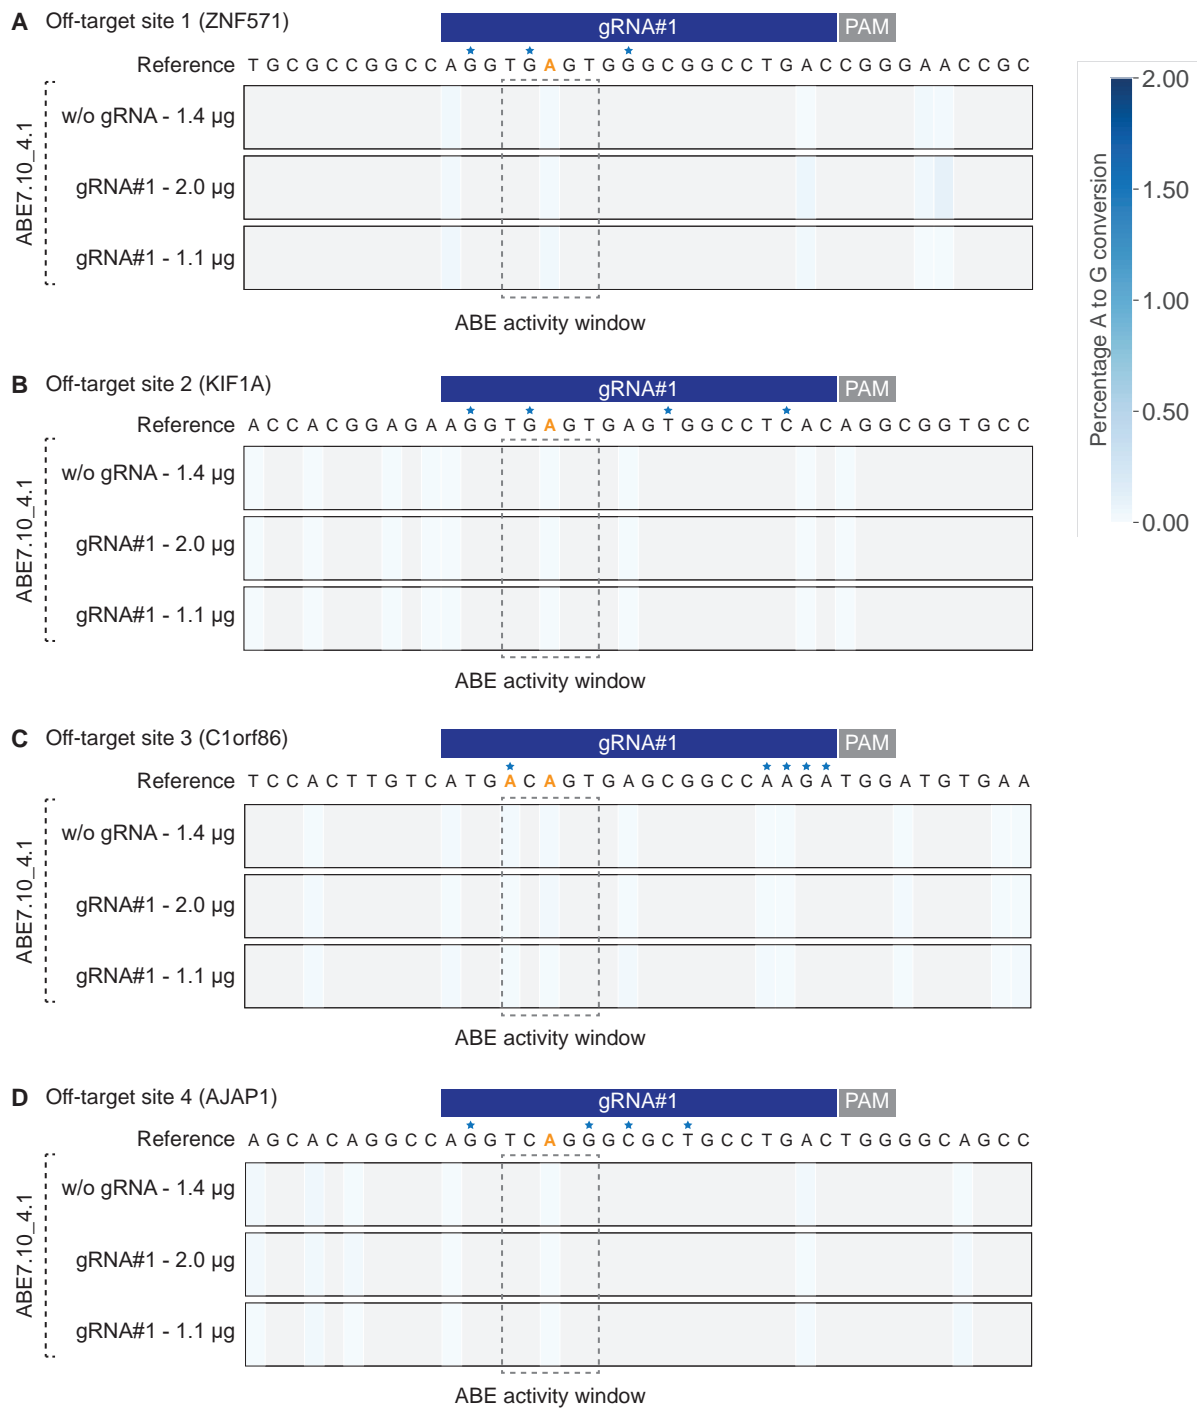

**Supplemental Figure 9. Heatmap of A>G conversion rates at the predicted off-target loci in patient MuSC.** Crispresso2 analysis of amplicon sequencing data showing the percentage of A>G conversion at each position of the quantification window at the four predicted exonic off-target sites (**A to D**) in Venus-positive patient MuSC. Adenines located in the ABE activity window are indicated in orange and mismatched nucleotides between the protospacer sequence and gRNA#1 are indicated with blue stars above. A range of concentrations for the ABE7.10\_4.1/gRNA#1 vector is shown. Venus-positive cells transfected with the ABE7.10\_4.1 vector without gRNA are shown as control.



## Supplemental Figure 10

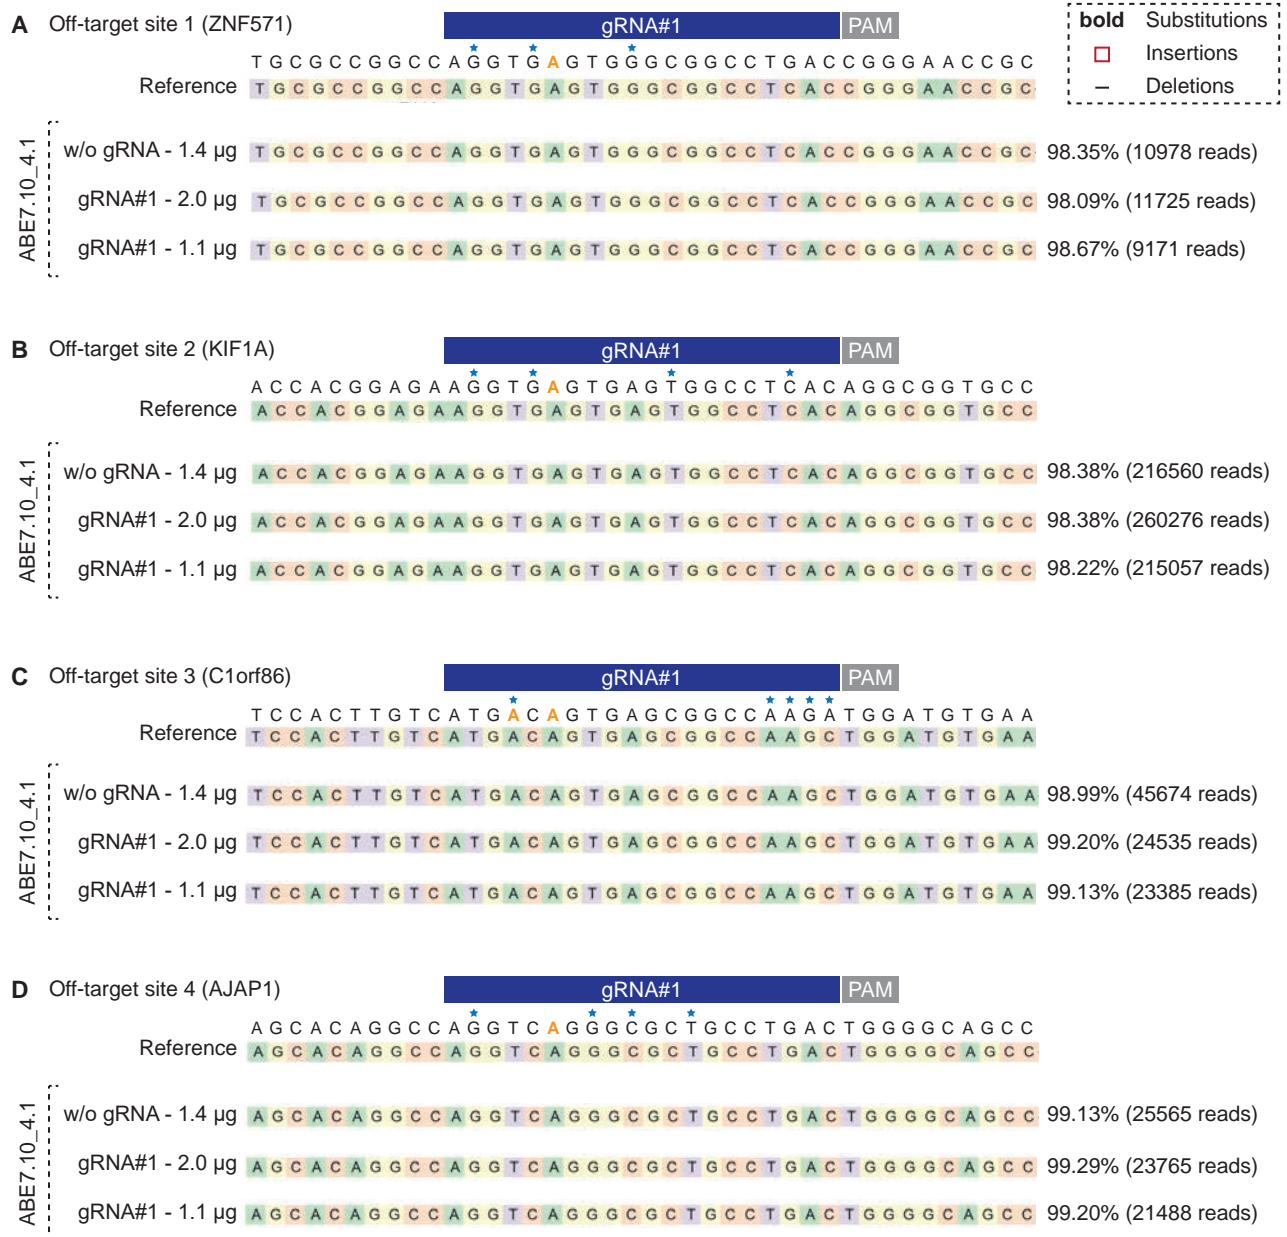

**Supplemental Figure 10. Allele frequencies at the predicted off-target loci in patient MuSC.** Crispresso2 analysis of allele frequencies in the quantification window at the four predicted exonic off-target sites (**A to D**) in Venus-positive patient MuSC. Mismatched nucleotides between the protospacer sequence and gRNA#1 are indicated with blue stars above. The total number and percentage of reads for each allele type is shown on the right. A range of concentrations for the ABE7.10\_4.1/gRNA#1 vector is shown. Venus-positive cells transfected with the ABE7.10\_4.1 vector without gRNA are shown as control.

**Supplemental Figure 11**

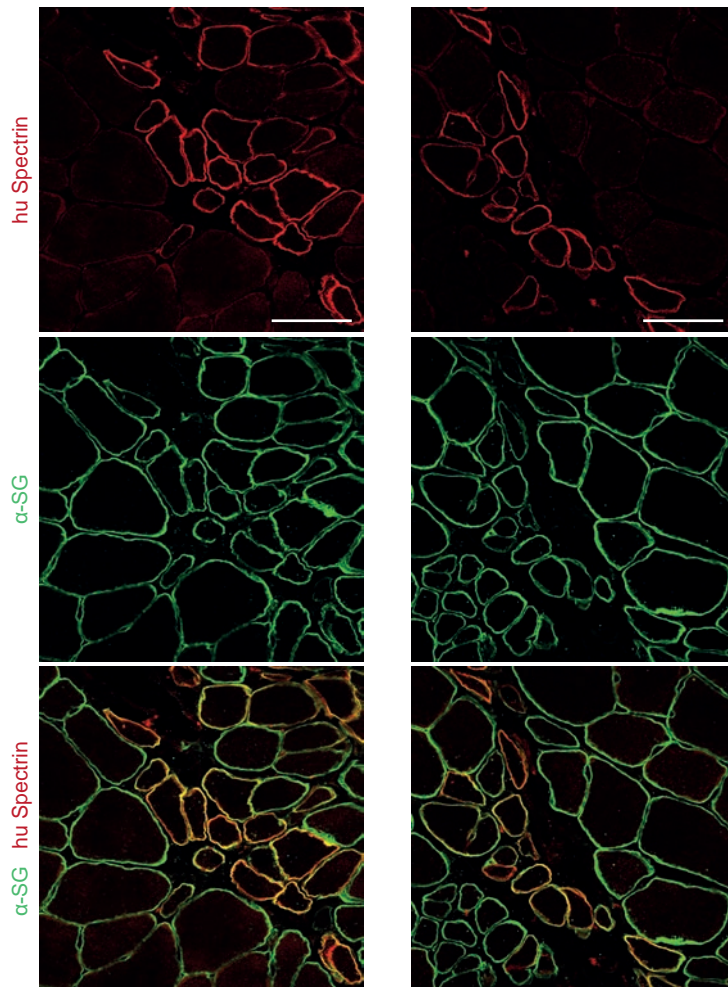

**Supplemental Figure 11. Donor-derived myofibers express  $\alpha$ -sarcoglycan.** Grafted muscles were immunostained with antibodies against human Spectrin and  $\alpha$ -sarcoglycan. Scale bars: 50  $\mu$ m.

**SUPPLEMENTAL TABLES****Supplemental Table 1: Myogenic marker expression in SGCA c.157Grep patient MuSC**

| Patient MuSC populations               | $\mu\text{g}$ vector |                | % positive cells |      |      |      |      |
|----------------------------------------|----------------------|----------------|------------------|------|------|------|------|
|                                        |                      |                | Desmin           | Pax7 | Myf5 | MyoD | Ki67 |
| Unedited                               | -                    |                | 89               | 60   | 58   | 54   | 37   |
| ABE7.10_4.1 (w/o sgRNA)                | 1.4 $\mu\text{g}$    |                | 97               | 13   | 46   | 71   | 37   |
| ABE7.10_4.1/gRNA#1<br>(SGCA c.175Grep) | 1.1 $\mu\text{g}$    |                | 54               | 16   | 30   | 30   | 57   |
|                                        | 1.4 $\mu\text{g}$    | cryopreserv.   | 99               | 27   | 40   | 66   | 25   |
|                                        |                      | after recovery | 99               | 34   | 45   | 64   | 39   |
|                                        | 1.7 $\mu\text{g}$    | cryopreserv.   | 98               | 20   | 53   | 44   | 39   |
|                                        |                      | after recovery | 99               | 23   | 24   | 60   | 28   |
|                                        | 2.0 $\mu\text{g}$    |                | 100              | 3    | 34   | 53   | 23   |

**Supplemental Table 2: Synthetic oligonucleotides for genomic PCR, RT-PCR / RT-qPCR, sequencing and cloning of ABE and minigene vectors**

| Oligo  | Name                          | Sequence 5' > 3'                    | Purpose                                                      |
|--------|-------------------------------|-------------------------------------|--------------------------------------------------------------|
| oHE24  | HE_SGCA i1 F                  | CGCTTCTCTCGGTCCCTTAG                | Genotyping<br>SGCA<br>c.157G>A<br>mutation / ABE<br>analysis |
| oHE25  | HE_SGCA e3 R                  | GTAGAGGAAGCCAGGGTGGT                |                                                              |
| oHE26  | HE_SGCA i6 F                  | TGGATTCAAACCAGGAGGTC                | Genotyping<br>SGCA c.748-<br>2A>G mutation                   |
| oHE27  | HE_SGCA ei7 R                 | CTTCATGCCACATTACCT                  |                                                              |
| oHE28  | BpII-site_oligo1              | CACCGGGTCTTCGAGAAGACCTc<br>gtcatcta | exchange of<br>BbsI to BpII site<br>in HE_p4.1               |
| oHE29  | BpII-site_oligo2              | AAACtagatgacgAGGTCTTCTCGAA<br>GACCC |                                                              |
| oHE55  | Sp_sgRNA_SGCAe<br>x2mut#1_for | ATGTCAGTGAGCGGCCTGACgtttt           | sgRNA#1<br>cloning into<br>ABE7.10_4.1<br>and _3.1           |
| oHE56  | Sp_sgRNA_SGCAe<br>x2mut#1_rev | GTCAGGCCGCTCACTGACATggtgt           |                                                              |
| oHE206 | SGCA-<br>201_CCDS_ex1 F1      | ATGGCTGAGACACTCTTCTG                | RT-PCR SGCA                                                  |
| oHE207 | Sgca_CCDS_ex9<br>R1           | TCAGTGCTGGTCCAGGATAA                |                                                              |
| oHE208 | SGCA_Sgca_ex6 F1              | GCGTTGACTGGTGCAATGT                 |                                                              |
| oHE209 | SGCA_Sgca_ex7<br>R1           | AGTGGGTGGGCAGAAGAAC                 |                                                              |
| oHE210 | SGCA_Sgca_ex3-4<br>F1         | GAGGTCACAGCCTACAATCG                |                                                              |
| oHE211 | SGCA_Sgca_ex5<br>R1           | TGGCTGCGCACCAGGAACT                 |                                                              |
| oHE238 | SGCA-<br>201_CCDS_ex1 F2      | TCTGGACTCCTCTCCTCGTG                |                                                              |
| oHE243 | ZNF571_Fwd1                   | GGTGCGGAGGAACACAATA                 |                                                              |
| oHE246 | KIF1A_Rev1                    | CACGCCGTCTTCAACATCATC               |                                                              |
| oHE248 | C1orf86_Rev1                  | CTCACCAACTGCCAGATGTG                |                                                              |



|        |                                  |                                                                                 |                                           |
|--------|----------------------------------|---------------------------------------------------------------------------------|-------------------------------------------|
| oHE249 | AJAP1_Fwd1                       | CCCCGGTTGGTTTGAAAACG                                                            | amplicon<br>sequencing                    |
| oHE255 | SGCA_NGS_ex2<br>fwd5             | TCTTTGTGCACACCTTGGAC                                                            | ABE ON-target<br>analysis;                |
| oHE256 | SGCA_NGS_ex2<br>rev1             | GAGGACTCAGATACCAAATTAGA<br>GG                                                   | primers for<br>amplicon<br>sequencing     |
| oHE259 | ZNF571_Rev2                      | AGTCCCACAGTTCGAGCAAG                                                            | ABE OFF-target                            |
| oHE260 | KIF1A_Fwd2                       | GGCAGGGGACAGAGTAAGAGA                                                           | analysis;                                 |
| oHE261 | C1orf86_Fwd2                     | GCCTGTCCTCTCTGAGTTGC                                                            | primers for                               |
| oHE262 | AJAP1_Rev2                       | TCAGGTGAGGCTTGTGAGG                                                             | amplicon<br>sequencing                    |
| oHE263 | SGCA_NGS_ex2<br>fwd5_ILLUM-ADAPT | <u>ACACTCTTTCCCTACACGACGCT</u><br><u>CTTCCGATCTTCTTTGTGCACACC</u><br>TTGGAC     | ABE ON- and<br>OFF-target;<br>primers for |
| oHE264 | SGCA_NGS_ex2<br>rev1_ILLUM-ADAPT | <u>GACTGGAGTTCAGACGTGTGCTC</u><br><u>TTCCGATCTGAGGACTCAGATAC</u><br>CAAATTAGAGG | amplicon<br>sequencing<br>containing the  |
| oHE265 | ZNF571_Fwd1_ILLU<br>M-ADAPT      | <u>ACACTCTTTCCCTACACGACGCT</u><br><u>CTTCCGATCTGGTGCGGAGGAAC</u><br>ACAATA      | Illumina<br>adapters<br>(underlined) as   |
| oHE266 | ZNF571_Rev2_ILLU<br>M-ADAPT      | <u>GACTGGAGTTCAGACGTGTGCTC</u><br><u>TTCCGATCTAGTCCCACAGTTCCG</u><br>AGCAAG     | 5'- extension                             |
| oHE267 | KIF1A_Fwd2_ILLUM<br>-ADAPT       | <u>ACACTCTTTCCCTACACGACGCT</u><br><u>CTTCCGATCTGGCAGGGGACAGA</u><br>GTAAGAGA    |                                           |
| oHE268 | KIF1A_Rev1_ILLUM<br>-ADAPT       | <u>GACTGGAGTTCAGACGTGTGCTC</u><br><u>TTCCGATCTCACGCCGTCTTCAA</u><br>CATCATC     |                                           |
| oHE269 | C1orf86_Fwd2_ILLU<br>M-ADAPT     | <u>ACACTCTTTCCCTACACGACGCT</u><br><u>CTTCCGATCTGCCTGTCCTCTCT</u><br>GAGTTGC     |                                           |
| oHE270 | C1orf86_Rev1_ILLU<br>M-ADAPT     | <u>GACTGGAGTTCAGACGTGTGCTC</u><br><u>TTCCGATCTCTCACCAACTGCC</u><br>AGATGTG      |                                           |

|        |                              |                                                                             |                                      |
|--------|------------------------------|-----------------------------------------------------------------------------|--------------------------------------|
| oHE271 | AJAP1_Fwd1_ILLU<br>M-ADAPT   | <u>ACACTCTTTCCCTACACGACGCT</u><br><u>CTTCCGATCTCCCCGGTTGGTTT</u><br>GAAAACG |                                      |
| oHE272 | AJAP1_Rev2_ILLU<br>M-ADAPT   | <u>GACTGGAGTTCAGACGTGTGCTC</u><br><u>TTCCGATCTTCAGGTGAGGCTTG</u><br>TGAGG   |                                      |
| oSS114 | ABE_Cas9_BgIII_re<br>v       | ttggccatctcgttgctgaagatctcttgaagtaa<br>catattcggttc                         | Gibson cloning<br>of ABE7.10_4.1     |
| oSS121 | ABE+kozak_fwd                | tttctacagatccttaattaagccgccaccatgt<br>ccgaa                                 |                                      |
| oAK19  | SGCA_ex1 F1                  | GCTGAGACACTCTTCTGGAC                                                        | RT-qPCR                              |
| oAK21  | SGCA_ex2 R1                  | CATGGTCCAAGGTGTGCAC                                                         | SGCA and                             |
| oAK23  | SGCA_Sgca_ex7<br>R2          | CAGAAGAACGGGTCATGCTC                                                        | <i>GAPDH</i>                         |
| oAK30  | GAPDH_ex1-Fwd                | GAAGGTGAAGGTCGGAGTC                                                         |                                      |
| oAK31  | GAPDH_ex3-Rev                | GAAGATGGTGATGGGATTTC                                                        |                                      |
| -      | MYH2_V1_Fwd                  | GGAACGGGCTGACATTGCTG                                                        | RT-qPCR                              |
| -      | MYH2_V1_Rev                  | GTCATTCCATGGCATCAGGACA                                                      | <i>MYH2</i>                          |
| -      | HindIII_SGCA_F               | AATTTaagcttCCCTGTCTCTGTCA<br>TCACC                                          | Cloning of<br>minigene<br>constructs |
| -      | EcoRI_SGCAPart1_<br>all_R    | ATTAgattcGCCTGTCAGGCCGCT<br>CACCGACAT                                       |                                      |
| -      | EcoRI_SGCAPart1<br>mut_all_R | ATTAgattcGCCTGTCAGGCCGCT<br>CACTGACAT                                       |                                      |
| -      | EcoRI_Hbbl2_all_F            | ATTAgattcAGTGTGGAAGTCTCA<br>GGATCG                                          |                                      |
| -      | Hbbl2_498_R                  | GAATGGTGCAAAGAGGCATG                                                        |                                      |
| -      | SGCAPart2_498_F              | catgcctcttgcaccattcACCCAGGCCG<br>GCGGGCTGGGGTGTA                            |                                      |
| -      | XhoI_SGCA_R                  | AATTTctcgagCAAGCCTCTCCTGT<br>CCACAG                                         |                                      |
| -      | T7_seq_F                     | TAATACGACTCACTATAGGG                                                        | PCR & seq.,                          |
| -      | BGH_R                        | TAGAAGGCACAGTCGAGG                                                          | minigene<br>assays                   |

**Supplemental Table 3: Reagents for iPSC generation and characterization**

| <b>Antibodies used for immunocytochemistry/flow-cytometry</b> |                      |                                                               |                              |
|---------------------------------------------------------------|----------------------|---------------------------------------------------------------|------------------------------|
|                                                               | <b>Antibody</b>      | <b>Dilution</b>                                               | <b>Company &amp; Cat #</b>   |
| Pluripotency<br>Markers<br>(Immunostaining)                   | Rabbit anti-OCT4     | 1:1000                                                        | Abcam #ab19857               |
|                                                               | Rabbit anti-SOX2     | 1:300                                                         | Abcam #ab97959               |
|                                                               | Rabbit anti-NANOG    | 1:100                                                         | Abcam #ab21624               |
|                                                               | Mouse anti-TRA-1-60  | 1:500                                                         | Abcam #ab16288               |
| Pluripotency<br>Markers (Flow<br>Cytometry)                   | Anti-OCT3/4 APC      | 1:50                                                          | Miltenyi Biotec #130-117-709 |
|                                                               | Anti-NANOG PE        | 1:100                                                         | Cell Signaling #14955S       |
|                                                               | Anti-TRA-1-60 Vio488 | 1:600                                                         | Miltenyi Biotec #130-106-872 |
|                                                               | Anti-SSEA4 VioBlue   | 1:20                                                          | Miltenyi Biotec #130-098-366 |
|                                                               | Anti-CD15 Vio770     | 1:100                                                         | Miltenyi Biotec #130-113-486 |
| <b>Primers</b>                                                |                      |                                                               |                              |
|                                                               | <b>Target</b>        | <b>Forward/Reverse primer (5'-3')</b>                         |                              |
| Sendai-virus (RT-PCR)                                         | SeV (total)          | GGATCACTAGGTGATATCGAGC /<br>ACCAGACAAGAGTTTAAGAGATATGTAT<br>C |                              |
|                                                               | SeV-KOS              | ATGCACCGCTACGAGTGAGCGC /<br>ACCTTGACAATCCTGATGTGG             |                              |
|                                                               | SeV-KLF-4            | TTCCTGCATGCCAGAGGAGCCC /<br>AATGTATCGAAGGTGCTCAA              |                              |
|                                                               | SeV-c-Myc            | TAACTGACTAGCAGGCTTGTCTG /<br>TCCACATACAGTCCTGGATGATGATG       |                              |
| Housekeeping<br>gene (RT-PCR)                                 | Hu18SRNA             | GTAACCCGTTGAACCCCAT /<br>CCATCCAATCGGTAGTAGCG                 |                              |

**Supplemental Table 4: Antibodies**

| <b>Antibody</b>        | <b>Clone</b> | <b>Company &amp; Cat No.</b>                | <b>Working dilution</b>              |
|------------------------|--------------|---------------------------------------------|--------------------------------------|
| $\alpha$ -sarcoglycan  | EPR14773     | Abcam, #ab189254                            | IF cells/tissue - 1:500; WB – 1:2000 |
| PAX7                   |              | Santa Cruz Biotechnology, #sc-81648         | IF cells - 1: 200 / tissue - 1: 100  |
| Desmin                 |              | Abcam, #ab15200                             | IF cells - 1:2,000                   |
| Desmin                 |              | Dako #M0760                                 | IF tissue – 1:50                     |
| Ki-67                  |              | ThermoFisher Scientific, #RM-9106-S0        | IF cells - 1:300                     |
| MYOD                   | 5.8A         | Santa Cruz Biotechnology, #sc-32758         | IF cells - 1:50                      |
| MYF-5                  | C20          | Santa Cruz Biotechnology, #sc-302           | IF cells - 1:2,000                   |
| MyHC                   | MF20         | Developmental Studies Hybridoma Bank, #MF20 | WB – 1:1000                          |
| Skeletal Myosin (FAST) | MY-32        | Sigma-Aldrich, #M4276                       | IF cells - 1:100                     |
| Hu Lamin A+C           | EPR4100      | Abcam, #ab108595                            | IF tissue - 1:4,000                  |
| Hu Spectrin            | RBC2/3D5     | Leica Biosystems, #NCL-SPEC1                | IF tissue - 1:100                    |
| Vinculin               | VIN-11-5     | Sigma-Aldrich, #V4505                       | WB – 1:200                           |
